# Supplementary material for: Assessment of Coastal Compound Flooding using an Integrated Coupled Modelling and Remote Sensing Approach
Source: Research Square preprint supplement (doi:10.21203/rs.3.rs-7751325/v1), 2025-10-27
Supplement: Supplementary file 1 [file 7c378afda83fdb804056ef5e.docx]

**Supplementary Material**

1. List of 13 Tidal Constituents data and their Influence

| *Table 1 Tidal Constituent* |
| --- |
| | Sr. No. | Constituent | Type | Primary Astronomical Influence | | --- | --- | --- | --- | | 1 | **M2** | Principal lunar semi-diurnal | Moon's gravitational pull | | 2 | **S2** | Principal solar semi-diurnal | Sun's gravitational pull | | 3 | **N2** | Larger lunar elliptic semi-diurnal | Lunar elliptical orbit variation | | 4 | **K2** | Lunisolar semi-diurnal | Combined lunar/solar declination | | 5 | **K1** | Lunisolar diurnal | Earth's rotation & celestial declination | | 6 | **O1** | Principal lunar diurnal | Lunar declination effects | | 7 | **P1** | Principal solar diurnal | Solar declination effects | | 8 | **Q1** | Larger lunar elliptic diurnal | Lunar perigee influence | | 9 | **2N2** | Lunar elliptical semi-diurnal | Second-order lunar elliptic component | | 10 | **L2** | Smaller lunar elliptic semi-diurnal | Lunar nodal modulation | | 11 | **MU2** | Lunar-solar semi-diurnal | Shallow-water interaction (M2+O1) | | 12 | **NU2** | Lunar elliptic semi-diurnal | Lunar nodal cycle variation | | 13 | **T2** | Solar elliptic semi-diurnal | Solar radiation pressure effects | |

2. River Discharge for Naraj and Jagatpur Station

| *Table 2 River Discharge* |
| --- |
| | Date and time | Naraj (m3/sec) | Jagatpur (m3/sec) | | --- | --- | --- | | 02/05/2019 0800 | 168.29 | 61.50 | | 03/05/2019 0800 | 182.78 | 66.50 | | 04/05/2019 0800 | 299.49 | 82.50 | | 05/05/2019 0800 | 385.80 | 91.28 | |

3. MODIS-Derived LULC Data and Assigned Mannings N value

| 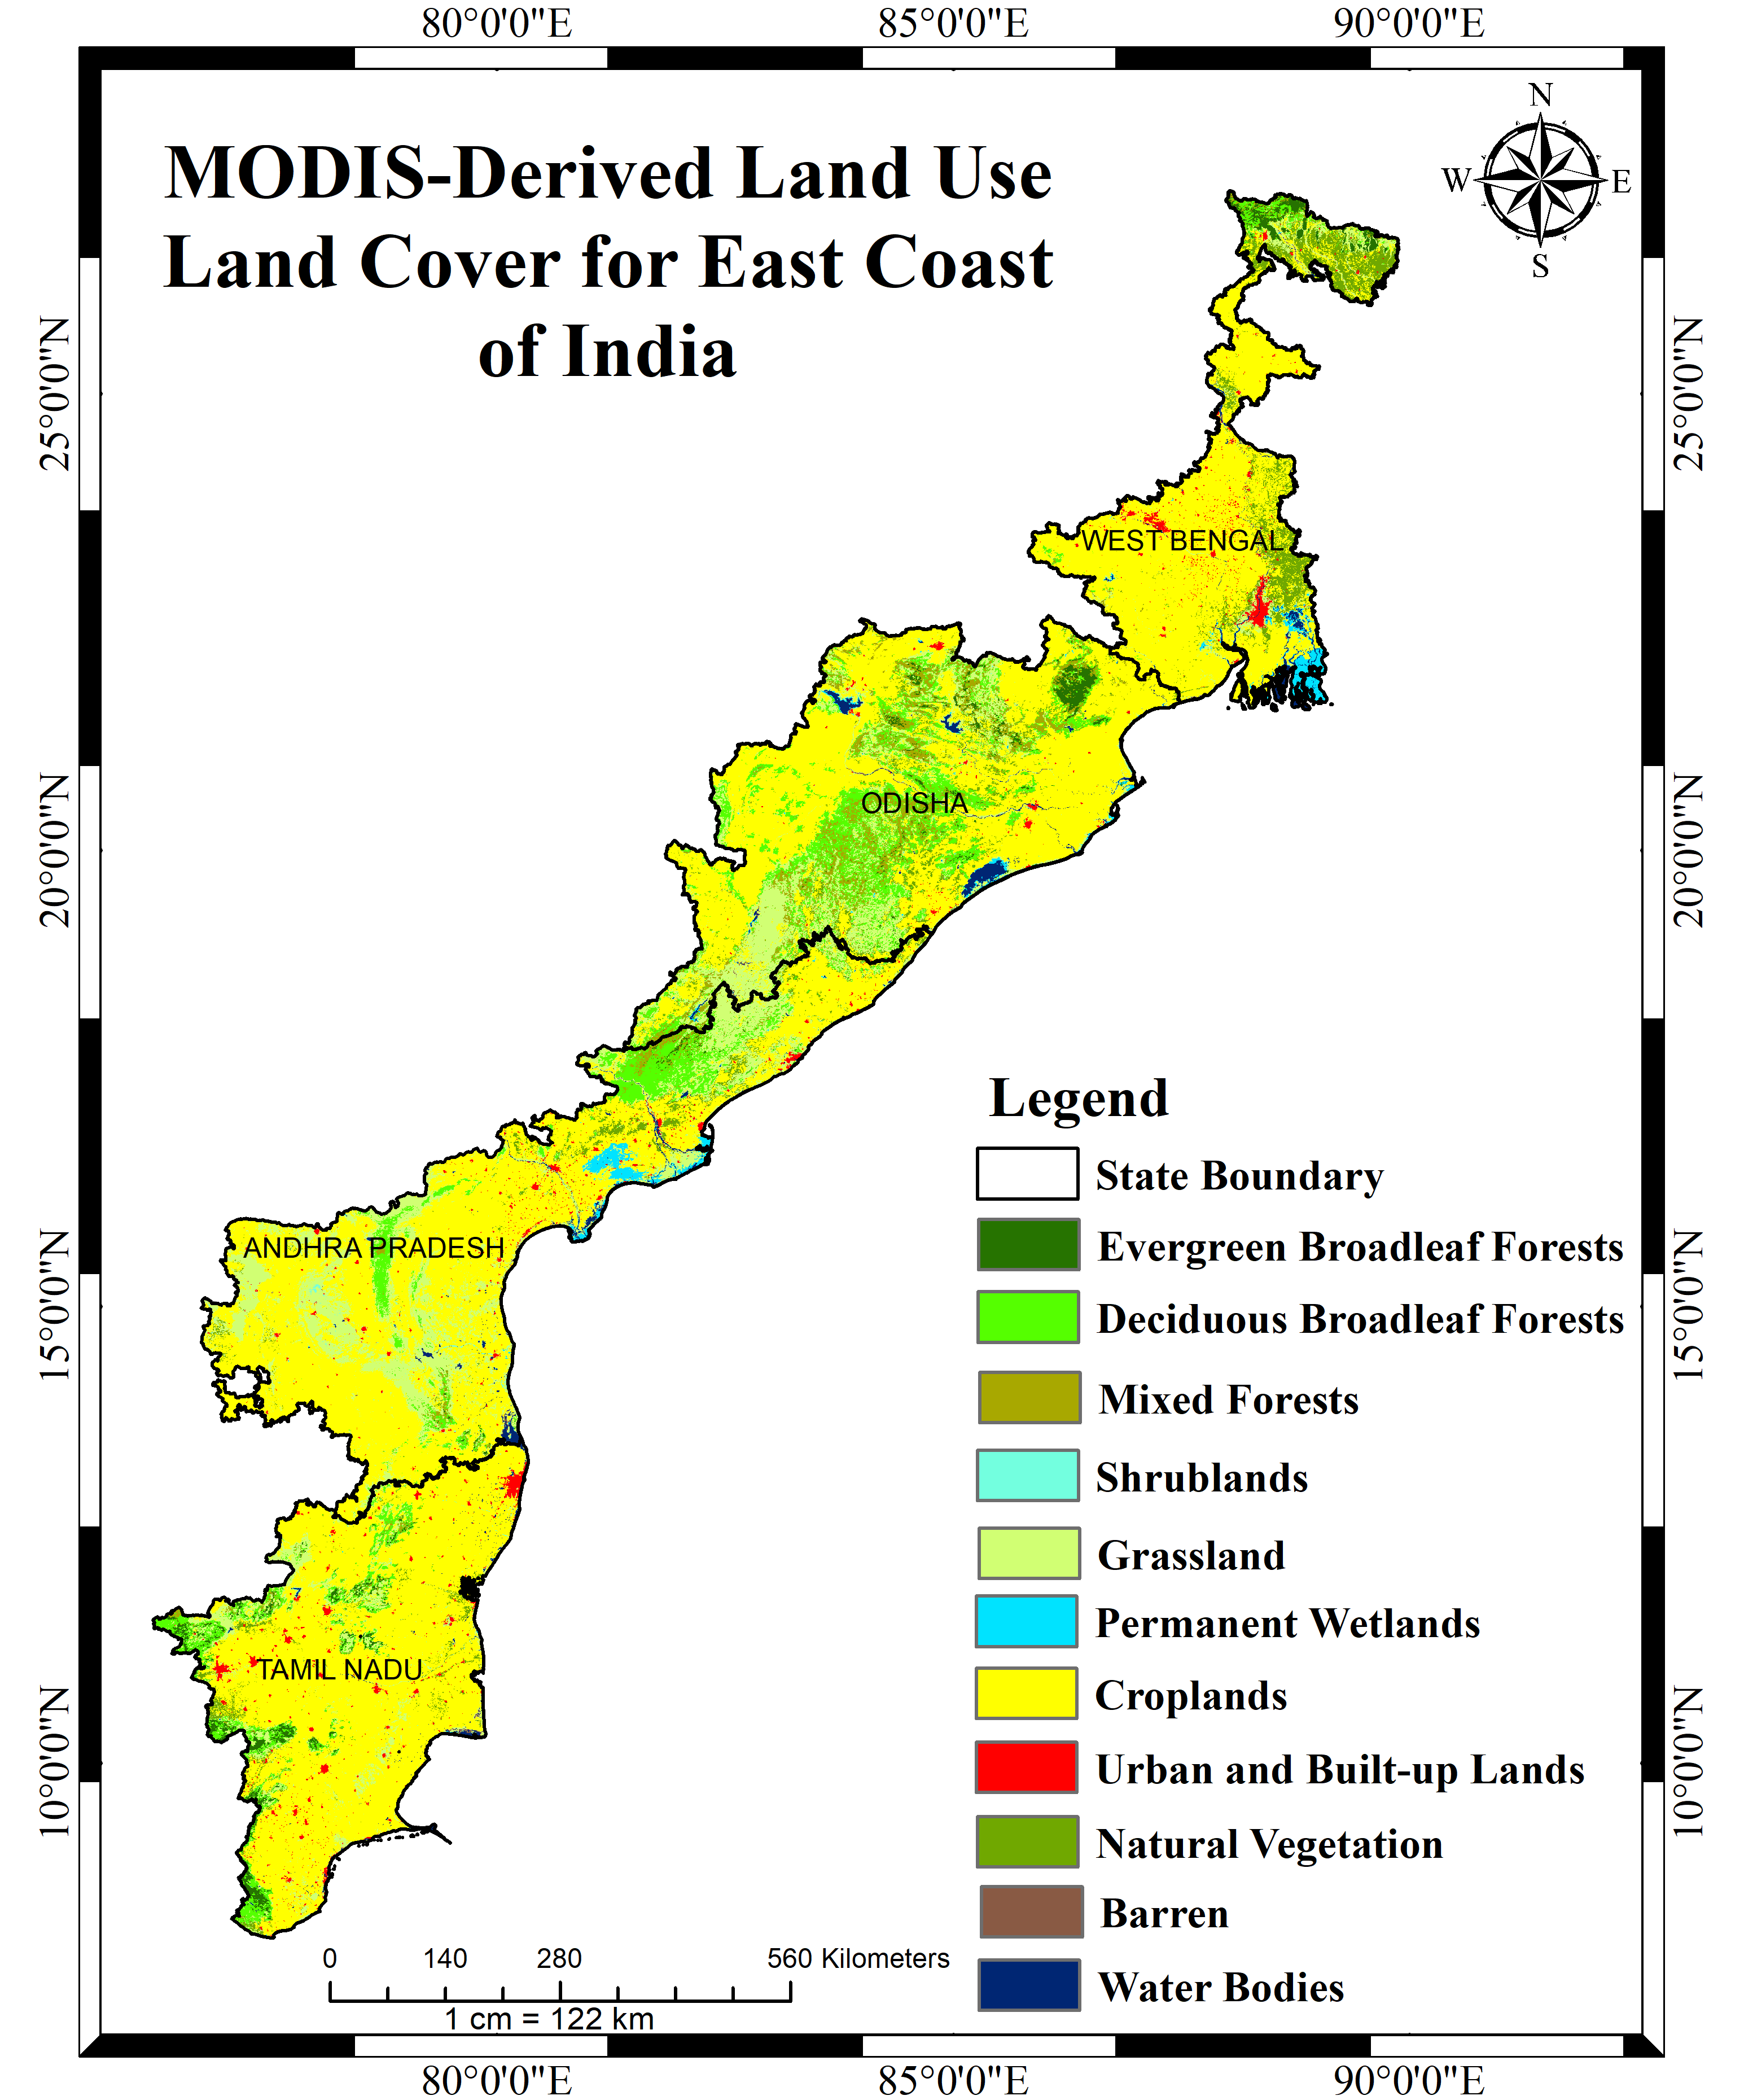 | | Class | Manning's n  Coefficient | Surface Roughness  Length | | --- | --- | --- | | Evergreen broad leaf forest | 0.12 | 0.5 | | Deciduous broad leaf forest | 0.10 | 0.5 | | Mixed forest | 0.10 | 0.35 | | Shrublands | 0.05 | 0.03 | | Grasslands | 0.05 | 0.10 | | Permanent wetlands | 0.05 | 0.30 | | Croplands | 0.04 | 0.30 | | Urban and built-up areas | 0.03 | 0.50 | | Natural Vegetation | 0.035 | 0.055 | | Barren | 0.30 | 0.02 | | Water bodies | 0.0035 | 0.0001 | |
| --- | --- | --- | --- | --- | --- | --- | --- | --- | --- | --- | --- | --- | --- | --- | --- | --- | --- | --- | --- | --- | --- | --- | --- | --- | --- | --- | --- | --- | --- | --- | --- | --- | --- | --- | --- | --- | --- |
| Figure 1 MODIS LULC Map Year 2018 | *Table 3 Manning’s ‘n Coefficients and Surface Roughness Length for Land Cover Classes* |

4. Sentinel-2 Classified LULC and Assigned Mannings N Value

| 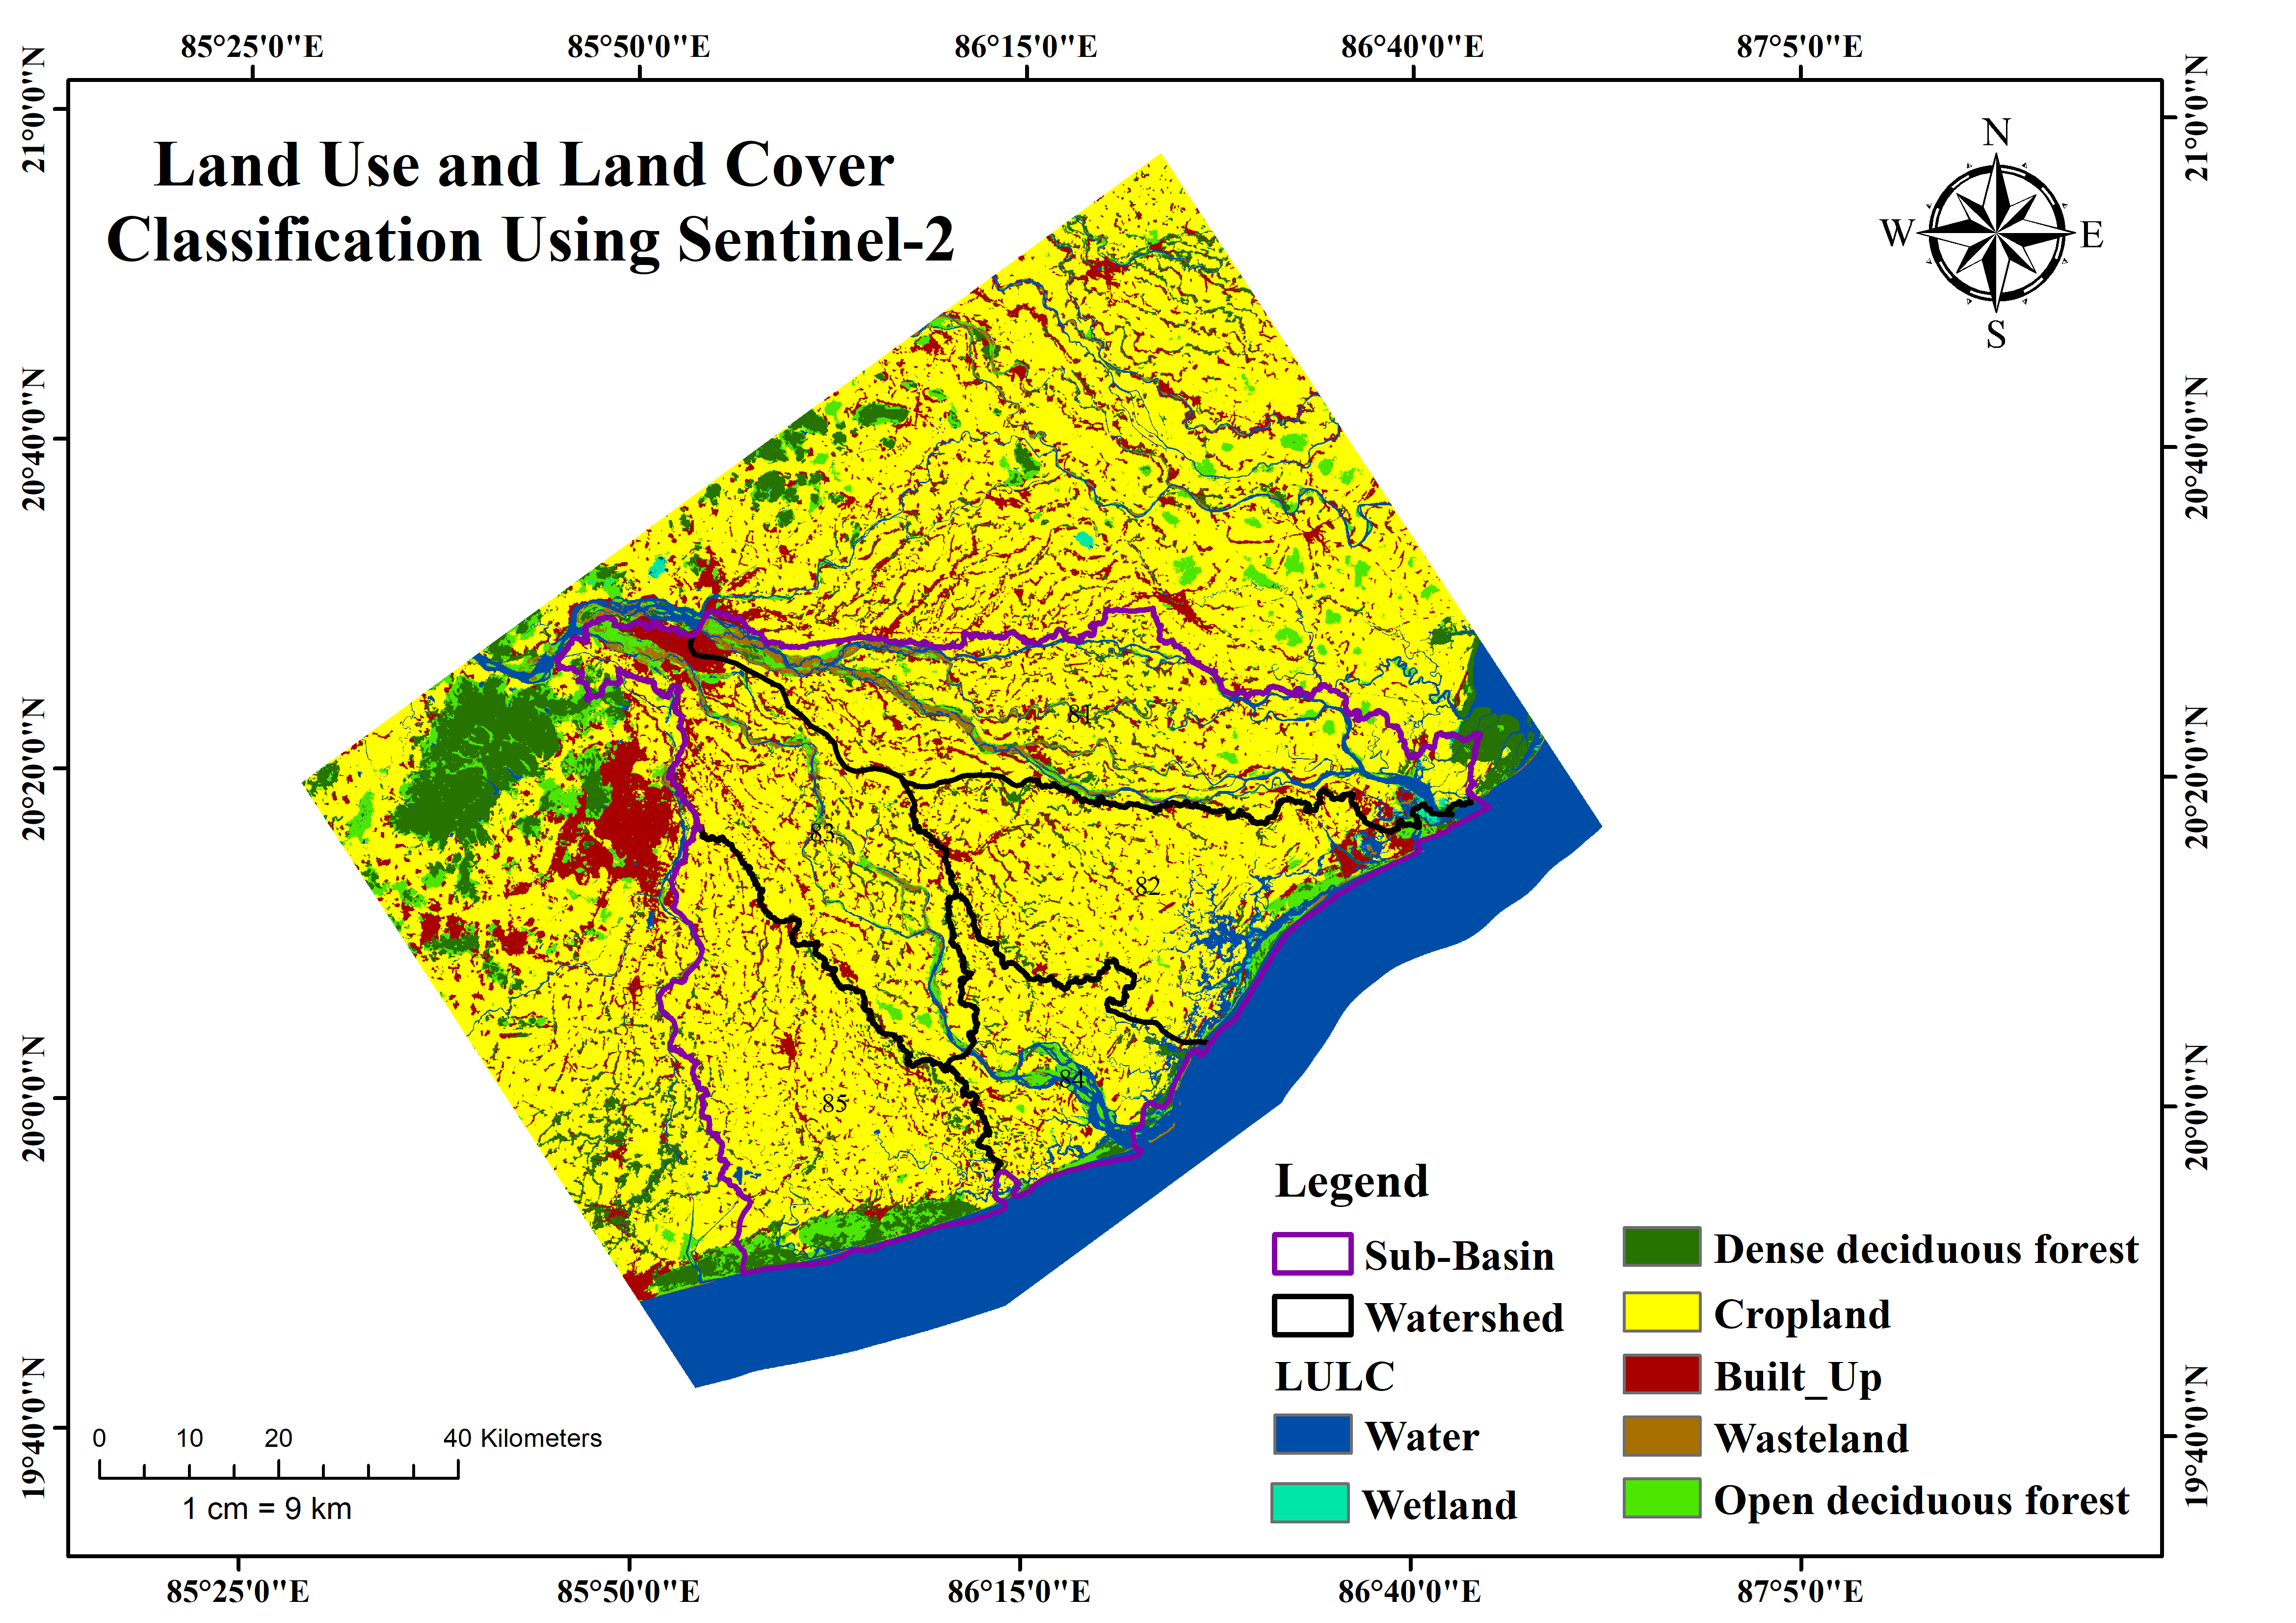 | | Class | Manning's n | Impervious Percentage (%) | | --- | --- | --- | | Dense Deciduous Forest | **0.1** | **5** | | Open Deciduous Forest | **0.15** | **3** | | Cropland | **0.04** | **2** | | Water | **0.02** | **0** | | Wetland | **0.05** | **0** | | Built-up | **0.1** | **85** | | Wasteland | **0.025** | **10** | |
| --- | --- | --- | --- | --- | --- | --- | --- | --- | --- | --- | --- | --- | --- | --- | --- | --- | --- | --- | --- | --- | --- | --- | --- | --- | --- |
| *Figure 2 Sentinel 2 LULC Map Year 2018* | *Table 4 Manning’s ‘n Coefficients for Land Cover Classes of Sentinel 2* |

| ***(a)***  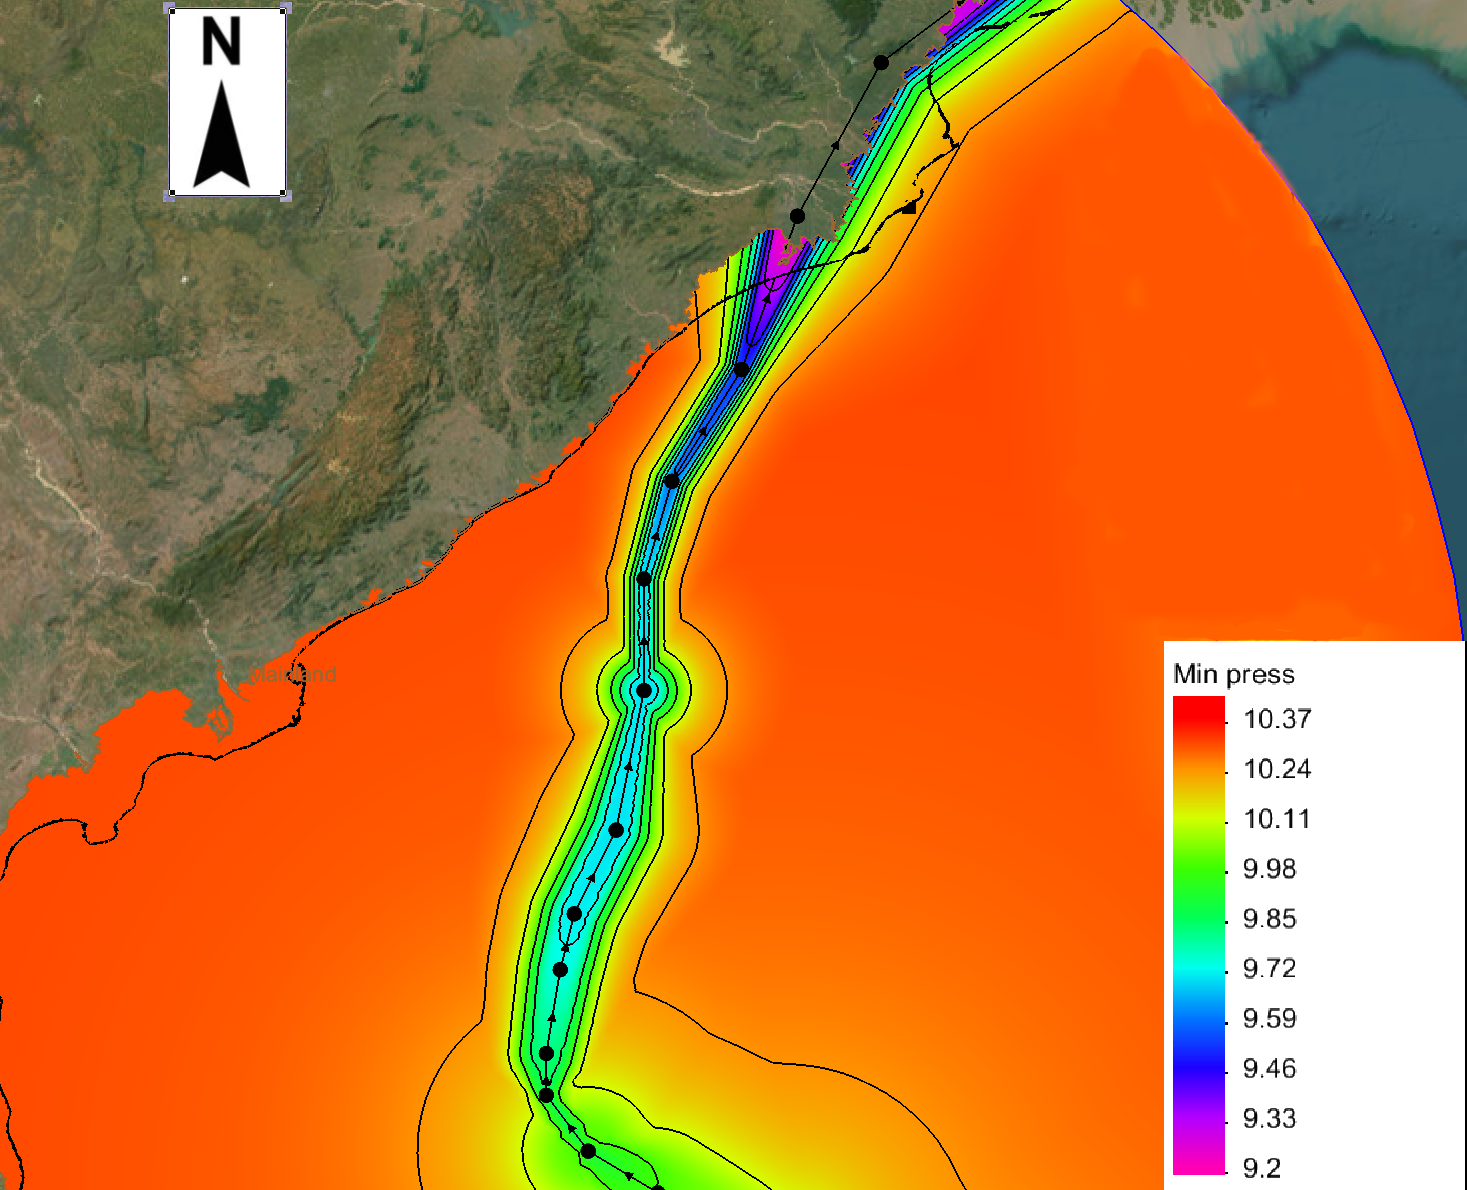 | ***(b)***  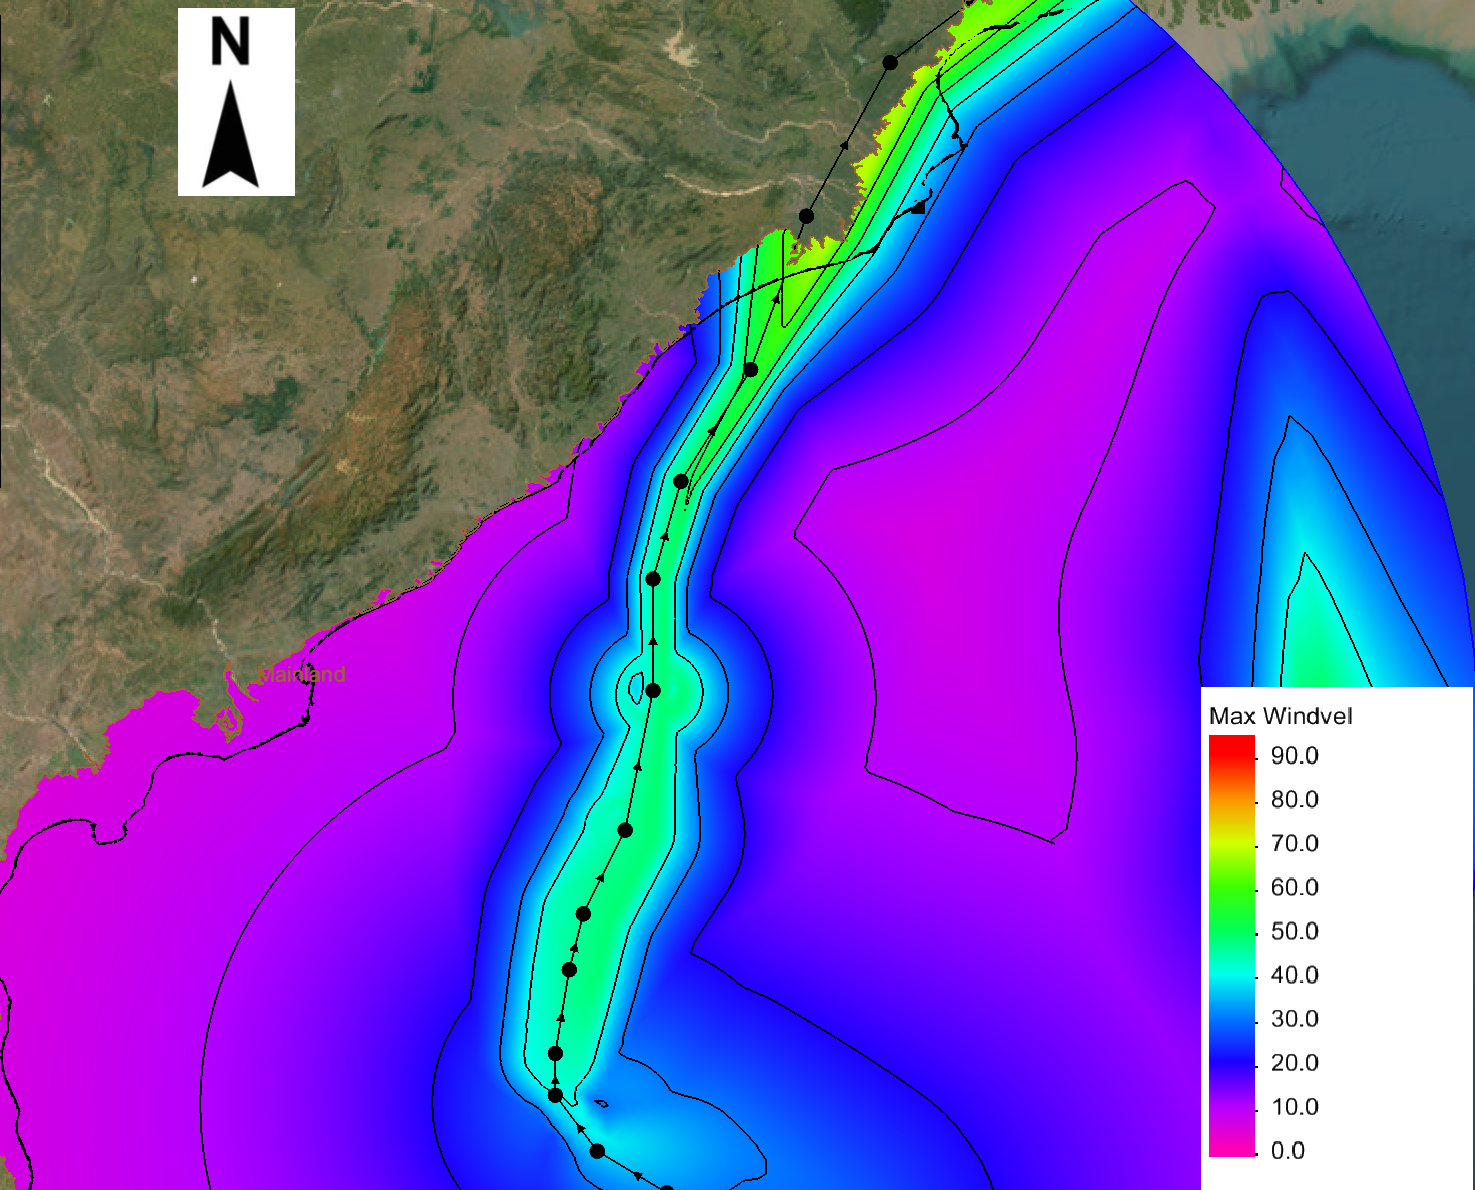 |
| --- | --- |
| Figure 3 Simulated (a) Atmospheric Pressure and (b) Wind Speed Distribution in Optimized model | |

5. Simulated Atmospheric Pressure and Wind Speed for the *ADCIRC* Domain Region
